# Supplementary material
Source: PubMed Central journal article supplement (PMC8882361)
Supplement: NIHMS1717589-supplement-Fig_S2.pdf [file NIHMS1717589-supplement-Fig_S2.pdf]

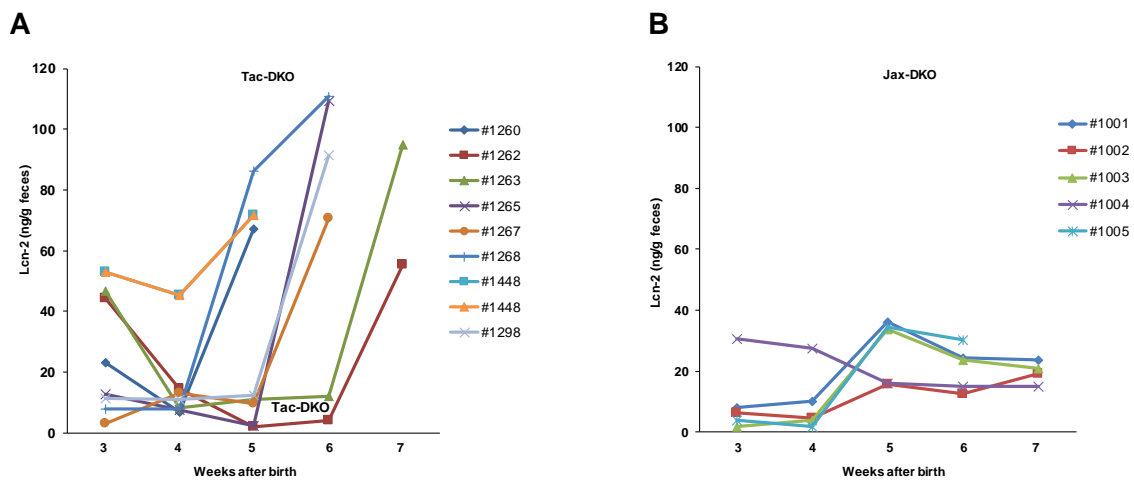

**Fig. S2. Kinetics of intestinal inflammation in doubly deficient *Nod2/Cybb* mice. (A and B)** Lcn-2 concentration was measured over time in fecal samples from Tac-DKO (n=9) (A) and Jax-DKO (n=5) mice (B). Each line represents an individual mouse. Data are pooled from two independent experiments.
