# Supplementary material
Source: PubMed Central journal article supplement (PMC8882361)
Supplement: NIHMS1717589-supplement-Fig_S3.pdf [file NIHMS1717589-supplement-Fig_S3.pdf]

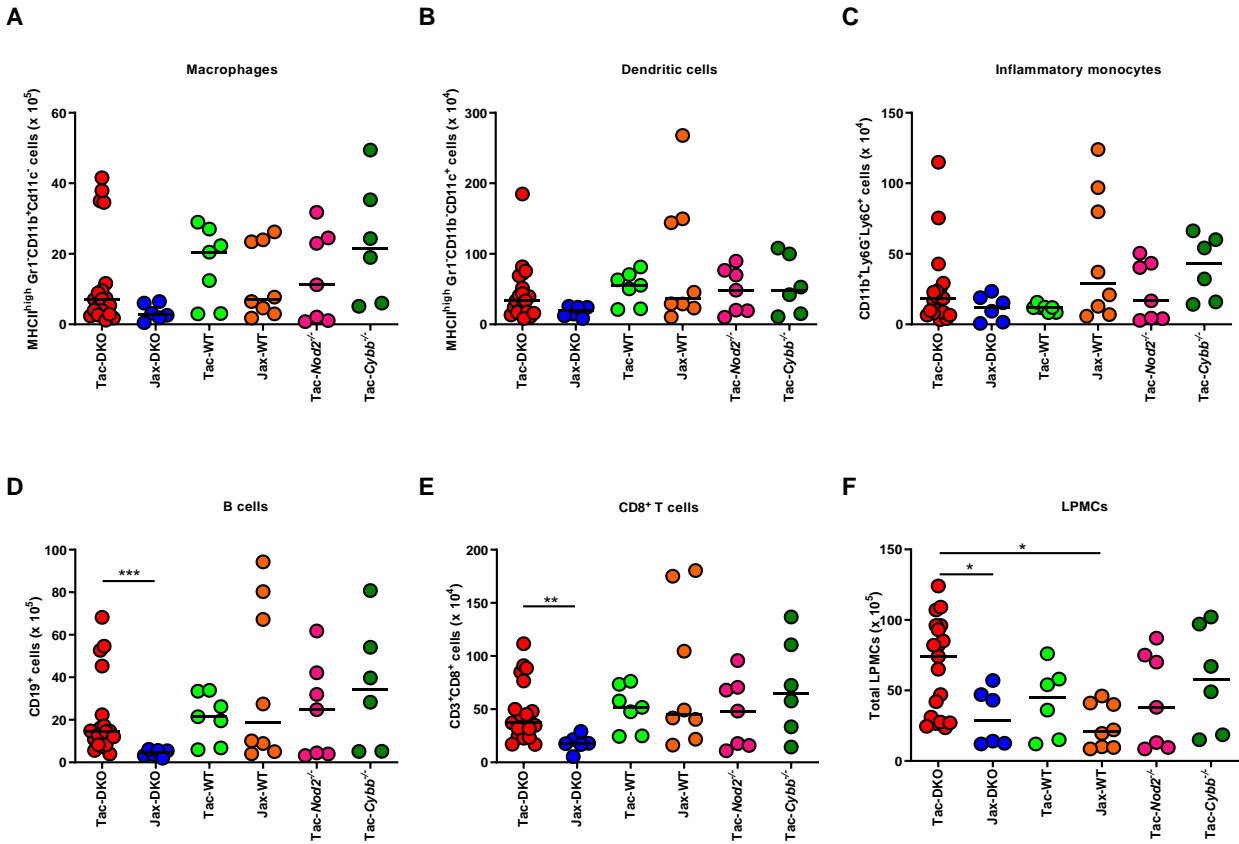

**Fig. S3. Cellular infiltrates in the large intestine of Tac- and Jax-fostered mice.**

(A to F) Cecal and colonic tissues were harvested from 4-6-week old Tac-DKO (n=19), Jax-DKO (n=6), Tac-WT (n=6), Jax-WT (n=8), Tac-*Nod2*<sup>-/-</sup> (n=7) and Tac-*Cybb*<sup>-/-</sup> (n=6) mice. Total numbers of LP macrophages (Gr1<sup>+</sup>, MHCII<sup>high</sup>, CD11b<sup>+</sup>, CD11c<sup>-</sup>) (A), dendritic cells (Gr1<sup>+</sup>, MHCII<sup>high</sup>, CD11b<sup>+</sup>, CD11c<sup>-</sup>) (B), inflammatory monocytes (CD45<sup>+</sup>, CD11b<sup>+</sup>, Ly6C<sup>+</sup>, Ly6G<sup>-</sup>) (C), B cells (CD45<sup>+</sup>, CD3<sup>-</sup>, CD19<sup>+</sup>) (D), CD8<sup>+</sup> T cells (CD45<sup>+</sup>CD3<sup>+</sup>CD8<sup>+</sup>) (E), and total LPMCs (F) are shown. Each dot represents an individual mouse. Bars show median; data are pooled from five independent experiments. Kruskal-Wallis test followed by Dunn's post-test (\*P<0.05; \*\*P<0.01; \*\*\*P<0.001).
