# Supplementary material
Source: PubMed Central journal article supplement (PMC8882361)
Supplement: NIHMS1717589-supplement-Fig_S4.pdf [file NIHMS1717589-supplement-Fig_S4.pdf]

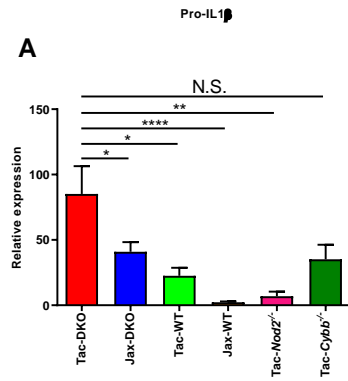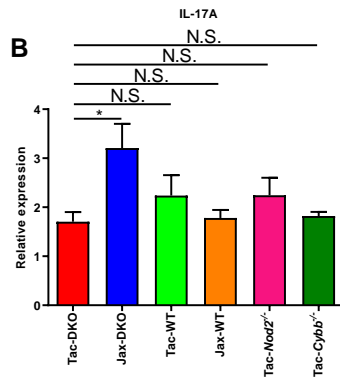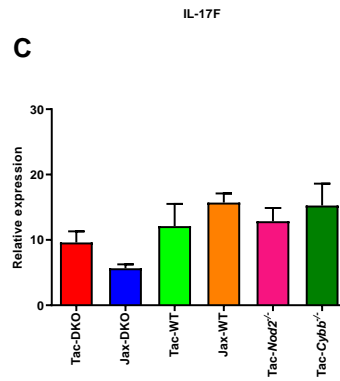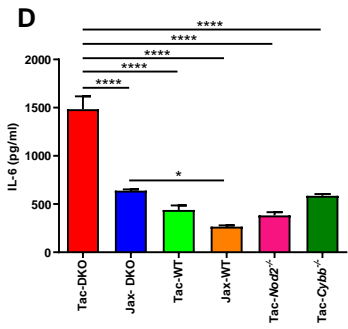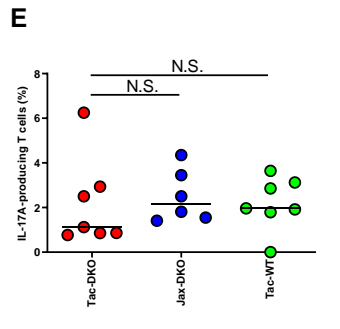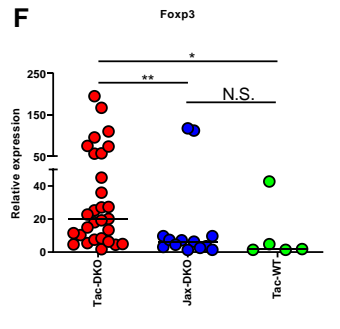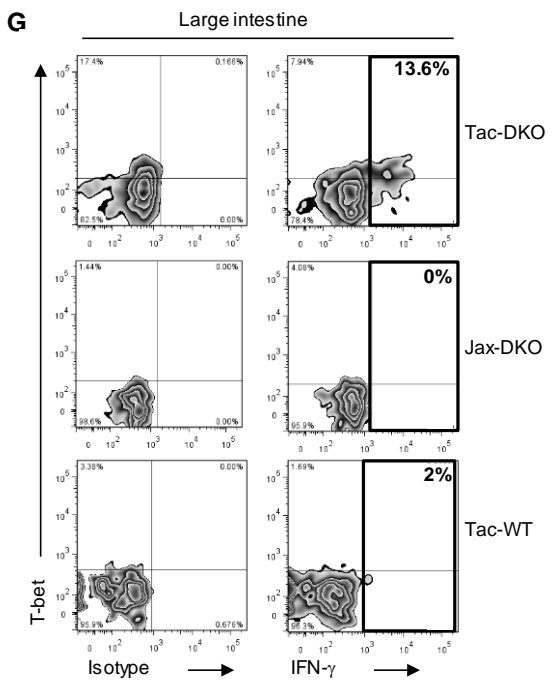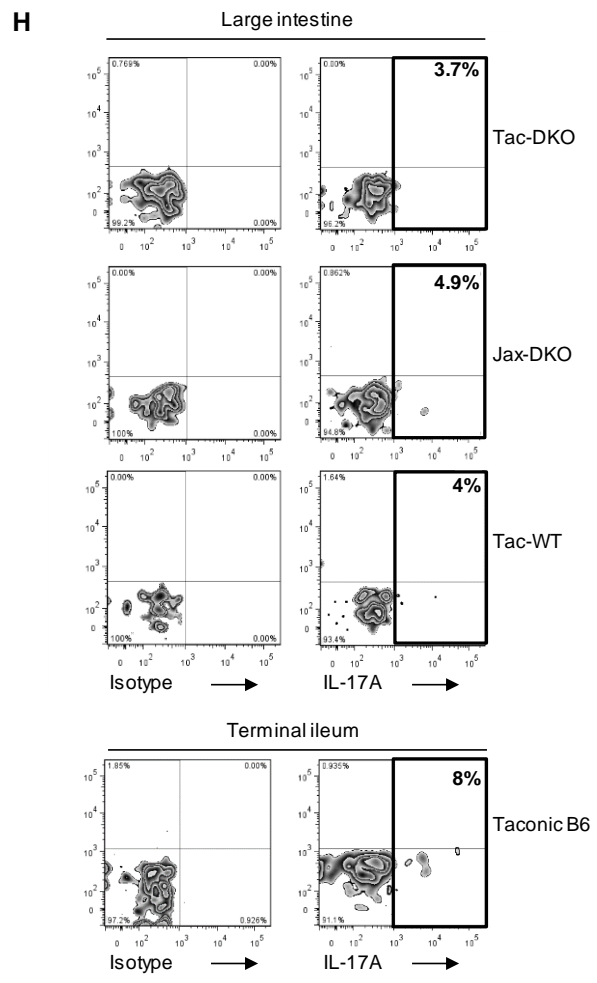

**Fig. S4. CD-like inflammation in *Nod2*<sup>-/-</sup>*Cybb*<sup>-/-</sup> mice is characterized by T<sub>H</sub>1 immune responses.** (A to C) LPMCs were isolated from 4-6-week-old fostered mice. Gene expression was assessed by qPCR and normalized to GAPDH expression. Mean ± SEM of at least 5 individual mice. Data are pooled from four independent experiments. (D) Total LPMCs from 4-6-week-old fostered mice were cultured for 12 hrs. IL-6 from culture supernatant was measured by ELISA (at least 3 individual mice each group). Data are mean ± SEM; data are pooled from two independent experiments. (A to D) One-way ANOVA followed by Tukey's multiple comparisons test (\*P<0.05; \*\*P<0.01; \*\*\*\*P<0.0001; N.S. not significant). (E) Percentages of IL-17A-producing CD4<sup>+</sup>T cells isolated from 4-6-week old Tac-DKO (n=7), Jax-DKO (n=6) and Tac-WT (n=7). Each dot represents an individual mouse. Bars show median; data are pooled from three independent experiments. N.S. not significant by Kruskal-Wallis test followed by Dunn's multiple comparisons test. (F) LPMCs were isolated from 4-6-week-old fostered mice. Gene expression was assessed by qPCR and normalized to GAPDH expression. Each dot represents an individual mouse (at least 5 individual mice each group). Bars show median. Data are pooled from four independent experiments. \*P<0.05; \*\*P<0.01; N.S. not significant by Kruskal-Wallis test followed by Dunn's multiple comparisons test. (G and H) Flow cytometry of CD4<sup>+</sup> T cells (CD45<sup>+</sup>CD3<sup>+</sup>CD4<sup>+</sup>) stained intracellularly for IFN-γ (G) and IL-17A (H). LPMCs from the terminal ileum of Taconic C57BL/6 mice (Taconic B6) were utilized as positive control for IL-17A intracellular staining.
