# Supplementary material
Source: PubMed Central journal article supplement (PMC8882361)
Supplement: NIHMS1717589-supplement-Fig_S5.pdf [file NIHMS1717589-supplement-Fig_S5.pdf]

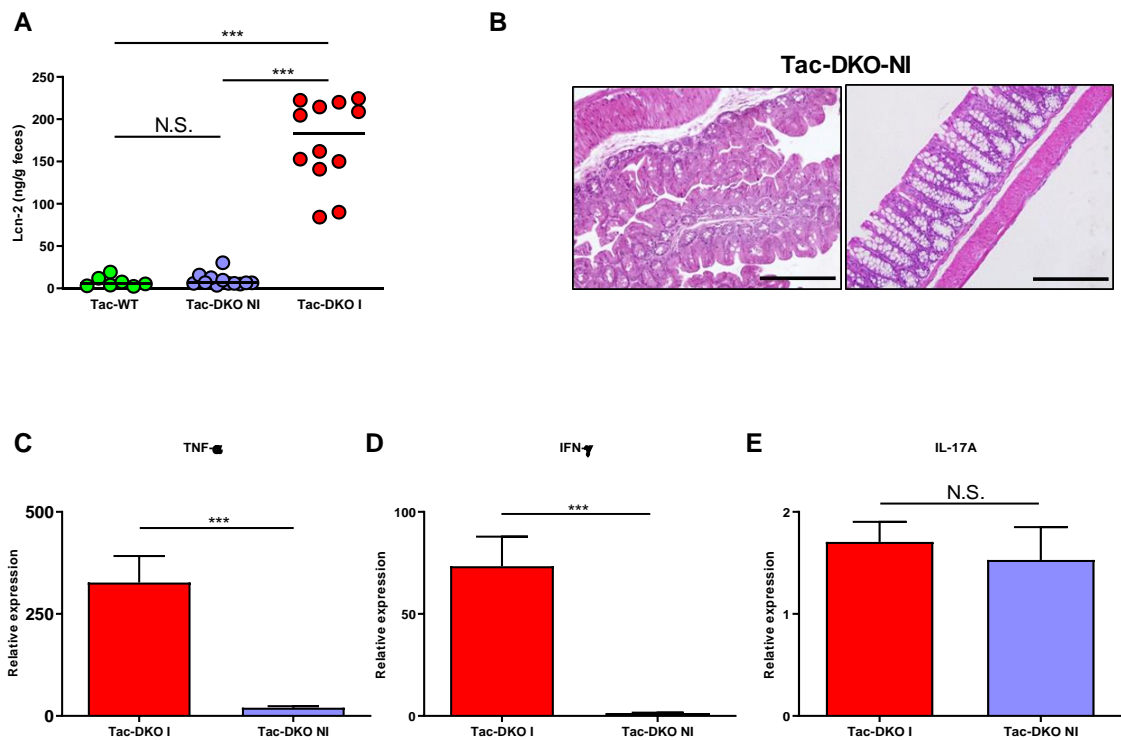

**Fig. S5. Characterization of Tac-fostered doubly deficient *Nod2/Cybb* mice before the development of colitis.** (A) Lcn-2 concentration in fecal samples from Tac-DKO mice before the development of intestinal inflammation (Tac-DKO NI, n=12), Tac-DKO animals with intestinal inflammation (Tac-DKO I, n=12) and from Tac-WT mice (n=7). Each dot represents an individual mouse. Bars show median; data are pooled from two independent experiments. Kruskal-Wallis test followed by Dunn's post-test (\*\*P<0.001; N.S. not significant). (B) Representative histology of H&E-stained sections from large intestines of Tac-DKO prior the development of intestinal inflammation (Tac-DKO NI). Scale bar, 500  $\mu$ m. (C to E) Gene expression in LP mononuclear cells normalized to GAPDH expression. Data are mean  $\pm$  SEM of 6 individual mice; data are pooled from four independent experiments. Two-tailed Unpaired t-test (\*\*P=0.0008 for TNF $\alpha$ , \*\*P=0.0006 for IFN $\gamma$ ; N.S. not significant).
