# Supplementary material
Source: PubMed Central journal article supplement (PMC8882361)
Supplement: NIHMS1717589-supplement-Fig_S8.pdf [file NIHMS1717589-supplement-Fig_S8.pdf]

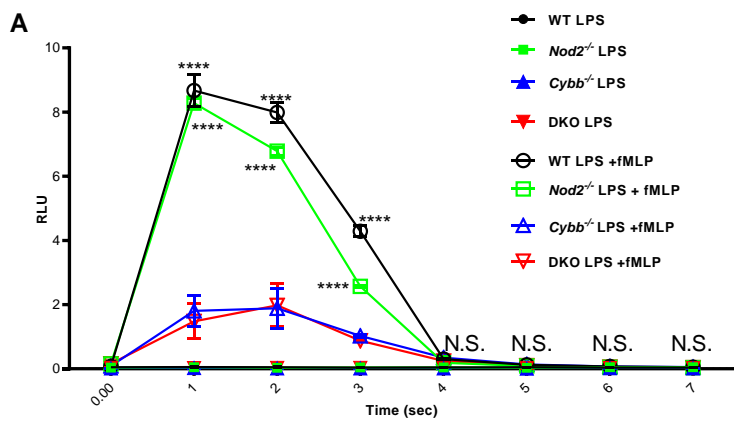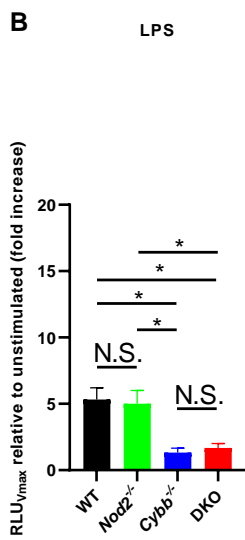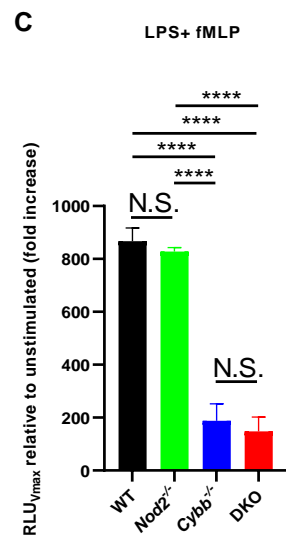

**Fig. S8. ROS production after microbial stimulation.** (A) Representative chemiluminescence curves of reactive oxygen species production from bone marrow-derived neutrophils isolated from Tac-WT (n=3), Tac-*Cybb*<sup>-/-</sup> (n=3), Tac-*Nod2*<sup>-/-</sup> (n=3) and Tac-DKO (n=3) mice primed with LPS and then stimulated with or without fMLP. The relative light units (RLU) were monitored at 1-second intervals and shown up to 7 minutes. Results are mean ± SEM; data are pooled from three independent experiments. \*\*\*\*P<0.0001; N.S. not significant by Two-way ANOVA followed by Tukey's multiple comparisons test. (B and C) Reactive oxygen species production measured by luminol-based chemiluminescence from bone marrow-derived neutrophils isolated from Tac-WT (n=3), Tac-*Cybb*<sup>-/-</sup> (n=3), Tac-*Nod2*<sup>-/-</sup> (n=3) and Tac-DKO (n=3) mice primed with LPS and then left untreated (B) or further stimulated with fMLP (C). Data shown as fold increase relative to unstimulated. Results are mean ± SEM; data are pooled from three independent experiments. \*P<0.05; \*\*\*\*P<0.0001; N.S. not significant by One-way ANOVA followed by Tukey's multiple comparisons test.
