# Supplementary material
Source: PubMed Central journal article supplement (PMC8882361)
Supplement: NIHMS1717589-supplement-Fig_S9.pdf [file NIHMS1717589-supplement-Fig_S9.pdf]

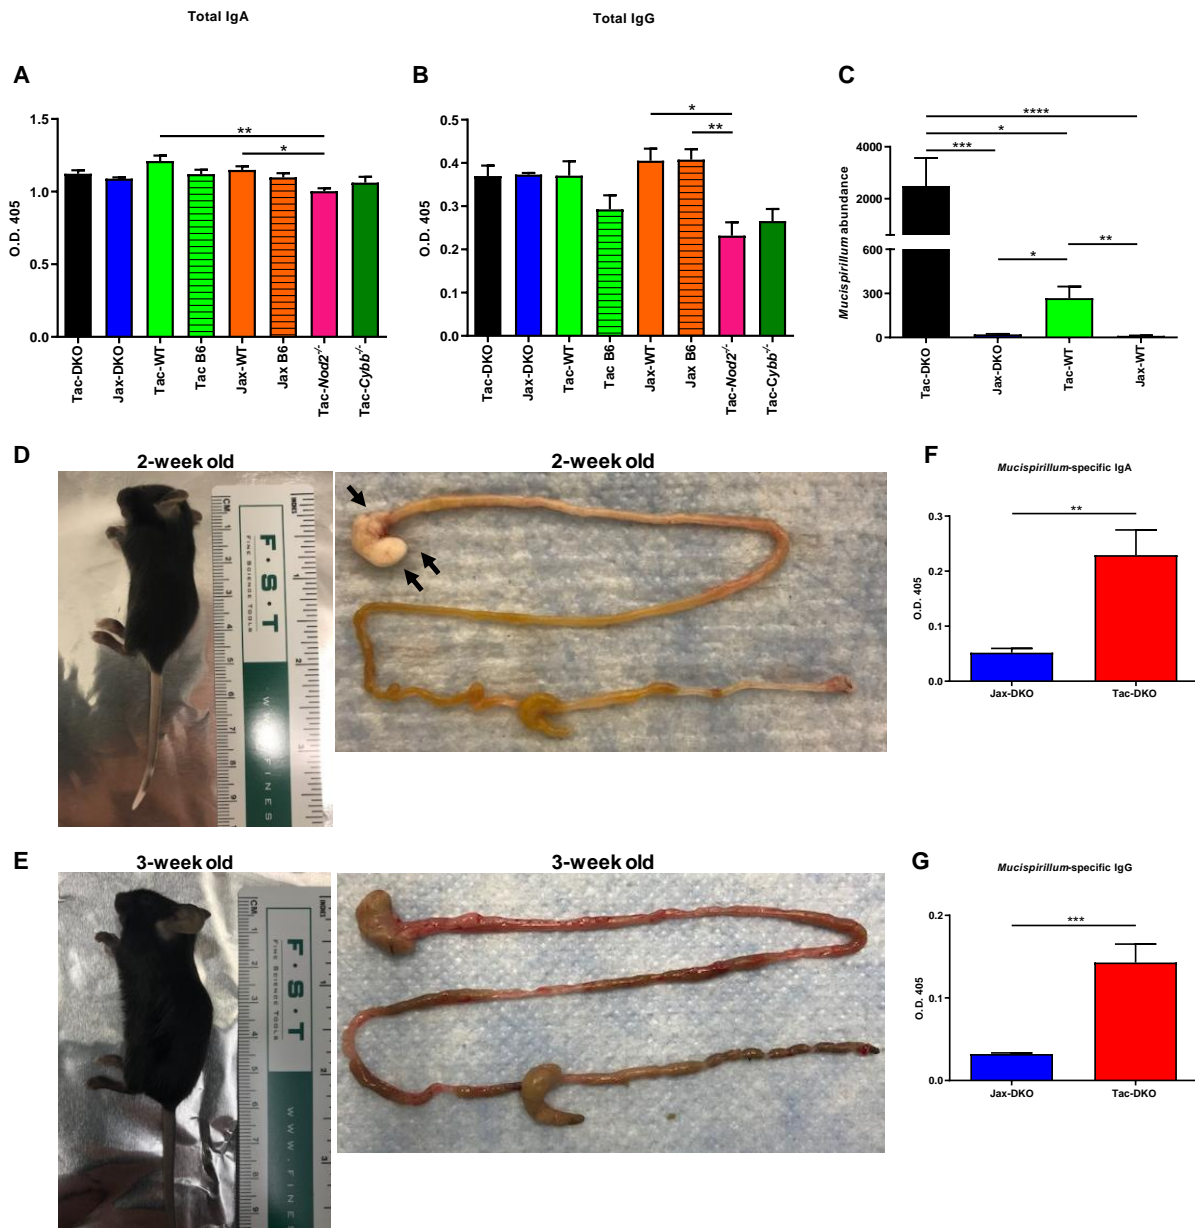

**Fig. S9. Immunoglobulin production in fostered mice.**

(A and B) ELISA of total IgA (A) and IgG (B) in the luminal content of Tac- and Jax-fostered mice. Tac C57BL/6 (Tac B6) and Jax C57BL/6 (Jax B6) mice that were not fostered are included as controls. Data are mean  $\pm$  SEM of at least 4 individual mice. Data are pooled from two

independent experiments. \*P<0.05; \*\*P<0.01 by One-way ANOVA followed by Tukey's multiple comparisons test. (C) Presence of *Mucispirillum* in fecal DNA extracted from ~6-week old Tac-DKO (n=12), Jax-DKO (n=5), Tac-WT (n=7), Jax-WT (n=7) and normalized to the universal 16S rRNA gene. Results are mean  $\pm$  SEM, data are pooled from two independent experiments. \*P<0.05; \*\*P<0.01; \*\*\*P<0.001; \*\*\*\*P<0.0001 by Kruskal-Wallis test followed by Dunn's post-test. (D and E) Representative images (left panels) and macroscopic appearance of intestine (right panels) from 2-week old (D) and 3-week old (E) Tac-DKO mice. Arrows show the presence of milk in the stomach. ELISA of serum *Mucispirillum*-specific IgA (F) and IgG (G) in Tac-DKO (n=8) and Jax-DKO (n=6) mice. Mean  $\pm$  SEM; data are pooled from two independent experiments. Two-tailed Unpaired t-test (\*\*P=0.0028; \*\*\*P=0.0002).
