# Supplementary material
Source: PubMed Central journal article supplement (PMC8882361)
Supplement: NIHMS1717589-supplement-Fig_S10.pdf [file NIHMS1717589-supplement-Fig_S10.pdf]

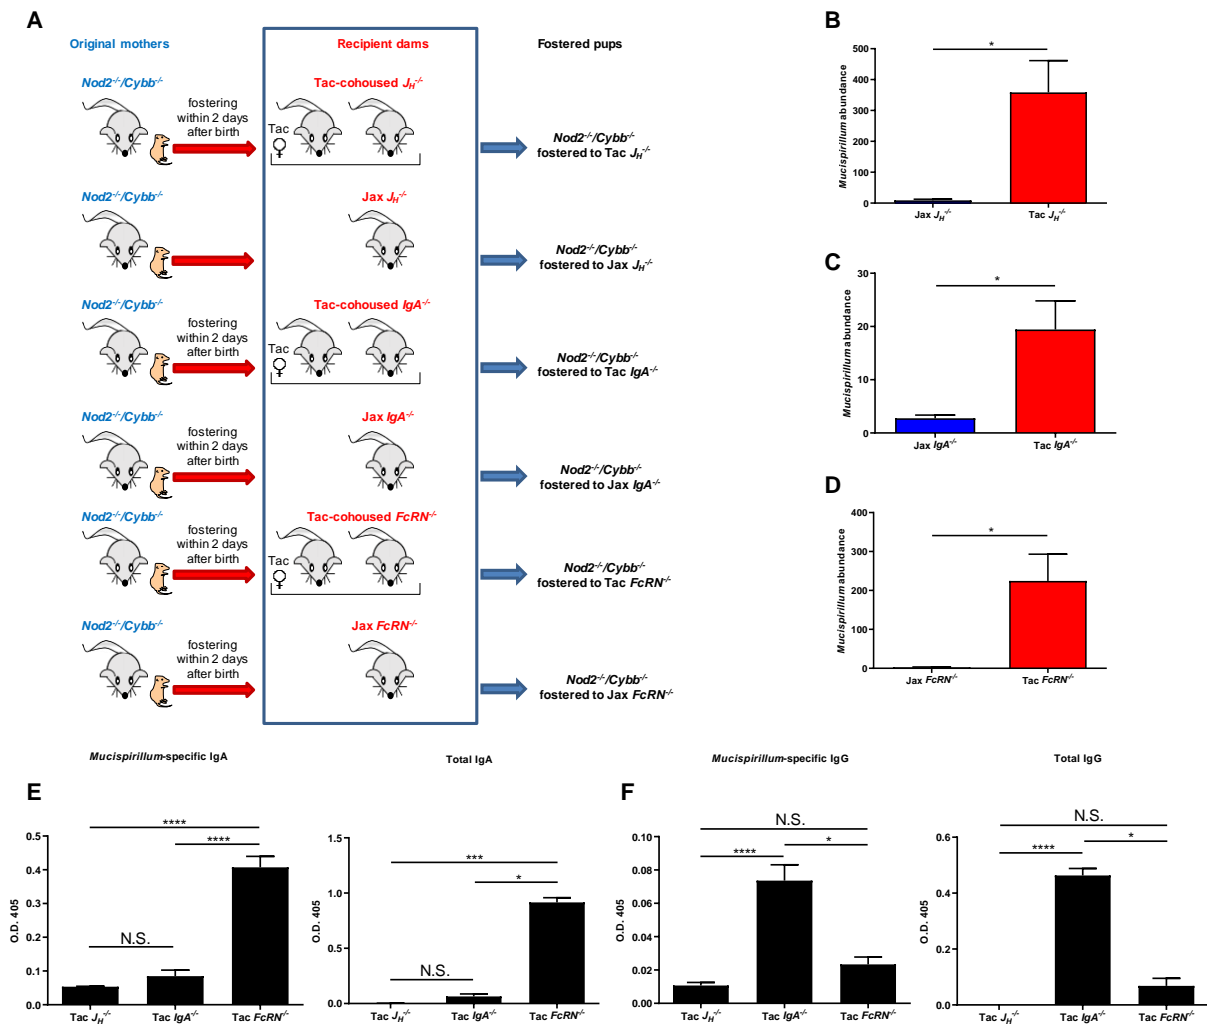

**Fig. S10. *Mucispirillum*-specific colonization and Ig production in  $J_H^{-/-}$ ,  $IgA^{-/-}$  and  $FcRn^{-/-}$  mice.** (A) Schematic representation of the experimental design for co-housing and fostering experiments. (B to D) The presence of *Mucispirillum* was quantified in fecal samples collected from Jax  $J_H^{-/-}$ ,  $IgA^{-/-}$  and  $FcRn^{-/-}$  mice before (Jax  $J_H^{-/-}$ ,  $IgA^{-/-}$  and  $FcRn^{-/-}$ ) and after 4-week co-housing with Tac mice (Tac  $J_H^{-/-}$ ,  $IgA^{-/-}$  and  $FcRn^{-/-}$ ) by qPCR. Results were normalized to the universal 16S rRNA gene. Data are mean  $\pm$  SEM of at least 4 mice. Data are pooled from two independent experiments. \* $P=0.0457$  (B); \* $P=0.0304$  (C); \* $P=0.0471$  (D) by Paired t-test. (E and

**F)** ELISA of *Mucispirillum*-specific and total IgA (E) and IgG (F) in the luminal content of Tac-co-housed  $J_H^{-/-}$ ,  $IgA^{-/-}$  and  $FcRn^{-/-}$  mice. Fecal samples were collected after at least 4 weeks of co-housing. Results are mean  $\pm$  SEM of at least 8 individual mice. Data are pooled from two independent experiments. \* $P < 0.05$ ; \*\*\* $P < 0.001$ ; \*\*\*\* $P < 0.0001$ ; N.S. not significant by Kruskal-Wallis test followed by Dunn's post-test.
