# Supplementary material
Source: PubMed Central journal article supplement (PMC8882361)
Supplement: NIHMS1717589-supplement-Fig_S11.pdf [file NIHMS1717589-supplement-Fig_S11.pdf]

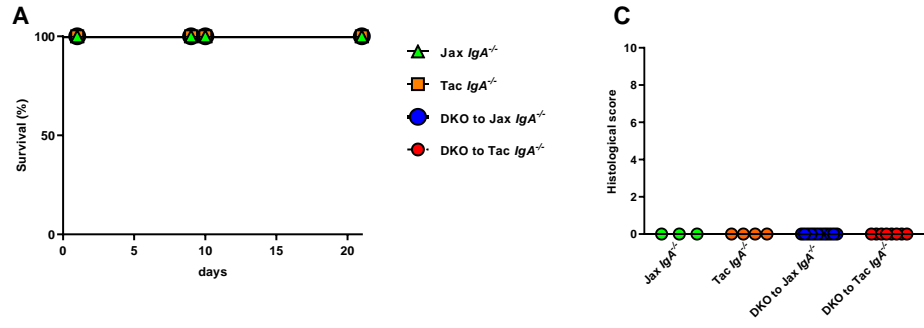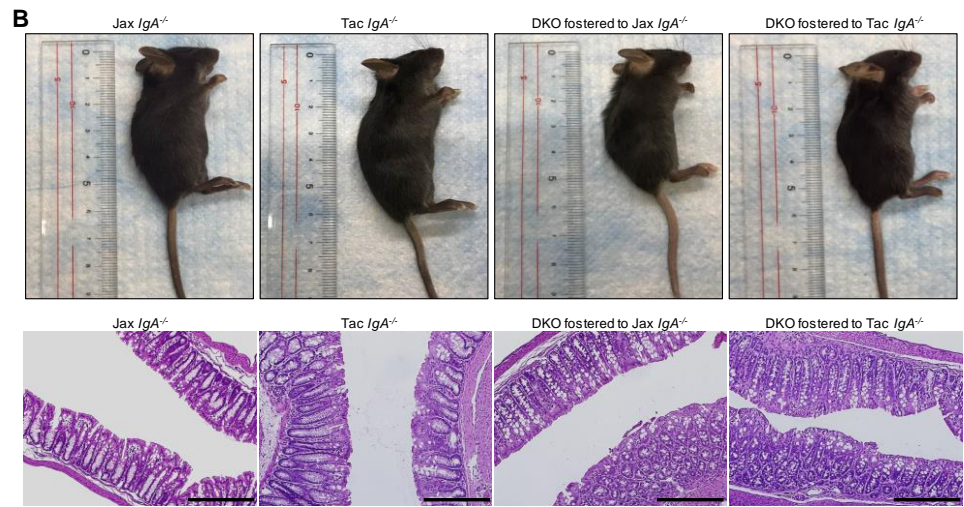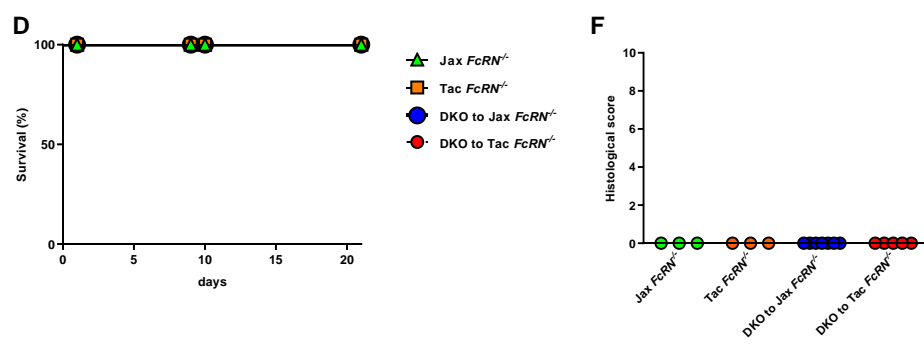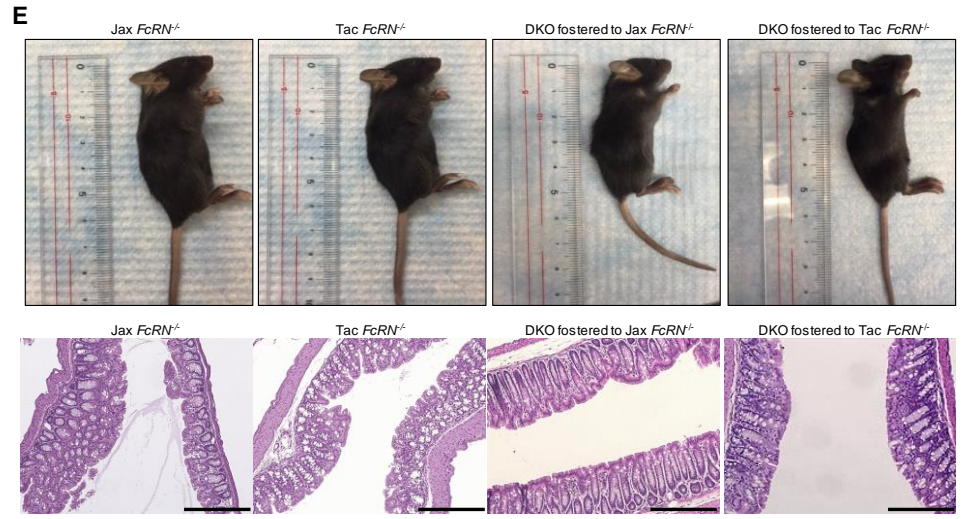

**Fig. S11. *Mucispirillum*-specific IgA and IgG cooperate in conferring protection against colitis in doubly deficient *Nod2/Cybb* mice.** (A) Mouse survival over time after fostering newborns DKO to Jax *IgA*<sup>-/-</sup> (DKO to Jax *IgA*<sup>-/-</sup>, n=12) or to Tac-co-housed *IgA*<sup>-/-</sup> mothers (DKO to Tac *IgA*<sup>-/-</sup>, n=8). Jax *IgA*<sup>-/-</sup> (n=3) and Tac *IgA*<sup>-/-</sup> (n=4) pups, that were not fostered, were included as controls. Data are pooled from two independent experiments. Log-rank test. (B) Representative images (top) and H&E-stained colonic sections (bottom) from 21-day old DKO fostered to Jax *IgA*<sup>-/-</sup> or to Tac *IgA*<sup>-/-</sup> mothers, and non-fostered Jax *IgA*<sup>-/-</sup> and Tac *IgA*<sup>-/-</sup> mice. Scale bar, 500 μm. (C) Histopathological scores of colonic tissue from (21-day old) DKO fostered to Jax *IgA*<sup>-/-</sup> (n=12) or Tac *IgA*<sup>-/-</sup> mothers (n=8), non-fostered Jax *IgA*<sup>-/-</sup> (n=3) and Tac *IgA*<sup>-/-</sup> mice (n=4). Each dot represents an individual mouse. Data are pooled from two independent experiments. (D) Mouse survival over time after fostering newborns DKO to either Jax *FcRn*<sup>-/-</sup> (DKO to Jax *FcRn*<sup>-/-</sup>, n=7) or to Tac-co-housed *FcRn*<sup>-/-</sup> mothers (DKO to Tac *FcRn*<sup>-/-</sup>, n=5). Jax *FcRn*<sup>-/-</sup> (n=3) and Tac *FcRn*<sup>-/-</sup> (n=3) pups, that were not fostered, were included as controls. Data are pooled from two independent experiments. Log-rank test. (E) Representative images (top) and H&E-stained colonic sections (bottom) from 21-day old DKO fostered to Jax *FcRn*<sup>-/-</sup> or to Tac *FcRn*<sup>-/-</sup> mothers, non-fostered Jax *FcRn*<sup>-/-</sup> and Tac *FcRn*<sup>-/-</sup> mice. Scale bar, 500 μm. (F) Histopathological scores of colonic tissue from (21-day old) DKO fostered to Jax *FcRn*<sup>-/-</sup> (n=7) or Tac *FcRn*<sup>-/-</sup> mothers (n=5), non-fostered Jax *FcRn*<sup>-/-</sup> (n=3) and Tac *FcRn*<sup>-/-</sup> mice (n=3). Each dot represents an individual mouse. Pooled data from two independent experiments.
