# Supplementary material
Source: PubMed Central journal article supplement (PMC8882361)
Supplement: NIHMS1717589-supplement-Fig_S12.pdf [file NIHMS1717589-supplement-Fig_S12.pdf]

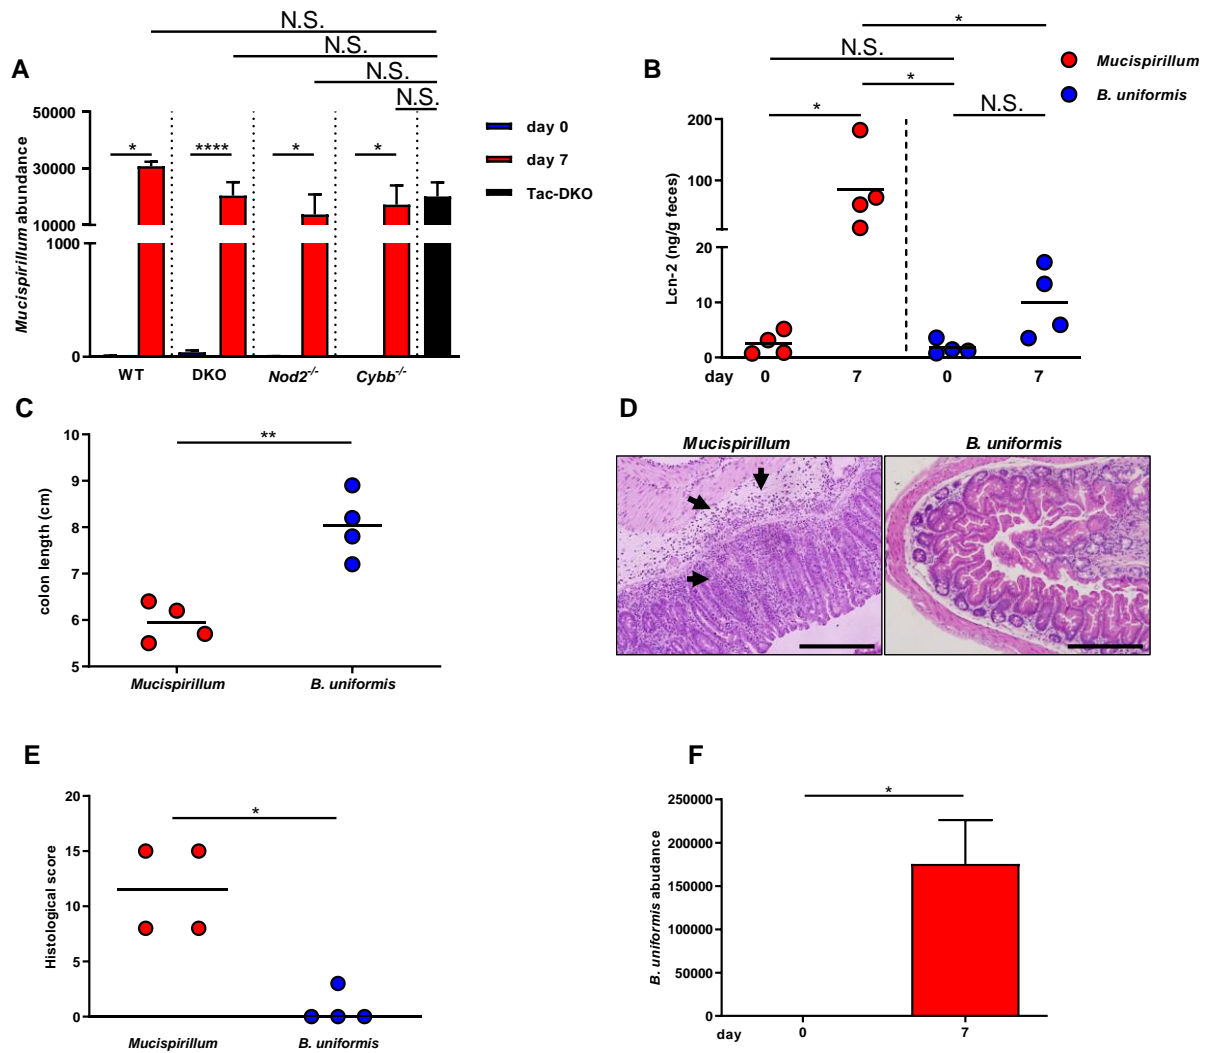

**Fig. S12. Specificity of *Mucispirillum*-induced intestinal inflammation in doubly deficient *Nod2/Cybb* mice.** (A) The presence of *Mucispirillum* in fecal samples from SPF DKO, *Cybb*<sup>-/-</sup>, *Nod2*<sup>-/-</sup> and WT mice gavaged with *Mucispirillum* was quantified before bacterial administration (day 0) and 7 days after infection (day 7) and normalized to the universal 16S rRNA gene. Fecal DNA from Tac-DKO mice was included as positive control. Mean ± SEM of at least 4 mice; data

are pooled from four independent experiments. \*P<0.05; \*\*\*\*P<0.0001; N.S. not significant by Kruskal-Wallis test followed by Dunn's post-test. **(B)** Fecal Lcn-2 concentration was measured before (day 0), on day 7 after oral infection with either *Mucispirillum* (n=4) or *B. uniformis* (n=4) in Jax-DKO mice. Bars show mean. One-way ANOVA followed by Tukey's multiple comparisons test (\*P<0.05; N.S. not significant). **(C)** Colon length was measured in *Mucispirillum*-infected DKO (n=4) and in *B. uniformis*-infected DKO mice (n=4) on day 7 post infection. Bars show mean. Two-tailed Unpaired t-test (\*\*P=0.0044). **(D)** Representative histology of H&E-stained sections from large intestines of *Mucispirillum*-infected and *B. uniformis*-infected DKO mice (on day 7 post infection). Arrows show inflammatory cell infiltrate. Scale bar, 500  $\mu$ m. **(E)** Histopathological scores of cecal and colonic tissues from *Mucispirillum*-infected (n=4) and *B. uniformis*-infected DKO mice (n=4) (on day 7 post infection). Bars show median. \*P=0.0286 by Two-tailed Mann Whitney test. **(F)** The presence of *B. uniformis* was quantified in fecal samples from *B. uniformis*-infected DKO mice before bacterial administration (day 0) and 7 days after infection (day 7) and normalized to the universal 16S rRNA gene. Data are mean  $\pm$  SEM of 4 mice. \*P=0.0133 by Two-tailed Unpaired t-test. (B to F) Pooled data from two independent experiments.
